# Supplementary material for: Heronapyrrole D: A case of co-inspiration of natural product biosynthesis, total synthesis and biodiscovery
Source: publisher site journal article supplement (doi:10.3762/bjoc.10.121), 2014-05-26
Supplement: Additional file 1 [file 1860-5397-10-121-S1.pdf]

# Supporting Information

for

## **Heronapyrrole D: A case of co-inspiration of natural product biosynthesis, total synthesis and biodiscovery**

Jens Schmidt<sup>1</sup>, Zeinab Khalil<sup>2</sup>, Robert J. Capon<sup>\*2</sup> and Christian B. W. Stark<sup>\*1</sup>

Address: <sup>1</sup>Fachbereich Chemie, Institut für Organische Chemie, Universität Hamburg, Martin-Luther-King-Platz 6, 20146 Hamburg, Germany and <sup>2</sup>Institute for Molecular Bioscience, The University of Queensland, St. Lucia, QLD 4072, Australia

Email: Christian B. W. Stark - stark@chemie.uni-hamburg.de, Robert J. Capon - r.capon@uq.edu.au

\* Corresponding authors

### **Experimental part and additional figures**

## Table of Contents

|       |                                                                                                                                                                                          |    |
|-------|------------------------------------------------------------------------------------------------------------------------------------------------------------------------------------------|----|
| 1     | Experimental details performed by Capon group .....                                                                                                                                      | S3 |
| 1.1   | General experimental details .....                                                                                                                                                       | S3 |
| 1.2   | Collection, cultivation, and characterisation of <i>Streptomyces</i> sp. (CMB-M0423) ..                                                                                                  | S3 |
| 1.3   | Analytical cultivation and chemical profiling of <i>Streptomyces</i> sp. (CMB-M0423)                                                                                                     | S3 |
| 1.4   | Preparative cultivation for <i>Streptomyces</i> sp. (CMB-M0423).....                                                                                                                     | S4 |
| 1.5   | Chemical analysis of synthetic and natural heronapyrrole D ( <b>6</b> ).....                                                                                                             | S4 |
| 1.6   | Antibacterial assay .....                                                                                                                                                                | S4 |
| 1.7   | Antifungal assay .....                                                                                                                                                                   | S5 |
| 2     | Experimental part performed by Stark group.....                                                                                                                                          | S5 |
| 2.1   | General experimental details .....                                                                                                                                                       | S5 |
| 2.2   | Synthesis of ( <i>S,E</i> )-1-((2 <i>R</i> ,5 <i>R</i> )-5-(2-hydroxypropan-2-yl)-2-methyltetrahydrofuran-2-yl)-4-methyl-6-(5-nitro-1 <i>H</i> -pyrrol-3-yl)hex-4-en-1-ol <b>6</b> ..... | S6 |
| 2.2.1 | Compound characterization.....                                                                                                                                                           | S7 |

## List of Figures

|            |                                                                                                                                                                                                                                                                                                                 |     |
|------------|-----------------------------------------------------------------------------------------------------------------------------------------------------------------------------------------------------------------------------------------------------------------------------------------------------------------|-----|
| Figure S1. | HPLC–DAD–MS chromatogram of the crude extract from <i>Streptomyces</i> sp. (CMB-M0423) showing the secondary metabolites production including minor metabolites. Analytical gradient H <sub>2</sub> O/MeCN containing 0.05% HCO <sub>2</sub> H using a Zorbax C <sub>8</sub> column; absorbance at 360 nm. .... | S7  |
| Figure S2. | HPLC–DAD (360 nm) chromatogram of samples of heronapyrrole D, (a) natural, (b) synthetic and (c) co-injection of natural and synthetic .....                                                                                                                                                                    | S8  |
| Figure S3. | Antibacterial activity of <b>6</b> .....                                                                                                                                                                                                                                                                        | S9  |
| Figure S4. | Antibacterial activity of <b>6</b> .....                                                                                                                                                                                                                                                                        | S10 |
| Figure S5. | <sup>1</sup> H NMR (500 MHz, CD <sub>3</sub> OD) spectrum of <b>6</b> .....                                                                                                                                                                                                                                     | S11 |
| Figure S6. | <sup>13</sup> C (125 MHz, CD <sub>3</sub> OD) spectrum of <b>6</b> .....                                                                                                                                                                                                                                        | S12 |

## **1 Experimental details performed by Capon group**

### **1.1 General experimental details**

Chiroptical measurements ( $[\alpha]_D$ ) were obtained on a JASCO P-1010 polarimeter in a  $100 \times 2$  mm cell. UV-visible spectra were obtained on a Cary 50 spectrophotometer in 1 cm quartz cells. NMR spectra were obtained on a Bruker Avance DRX600 spectrometer, in the solvents indicated and referenced to residual  $^1\text{H}$  and  $^{13}\text{C}$  signals in deuterated solvents. Electrospray ionization mass spectra (ESI-MS) were acquired using an Agilent 1100 Series separations module equipped with an Agilent 1100 Series LC/MSD in both positive and negative ion modes. High-resolution ESI-MS measurements were obtained on a Bruker micrOTOF mass spectrometer by direct infusion in MeCN at  $3 \mu\text{L}/\text{min}$  using sodium formate clusters as an internal calibrant. HPLC was performed using an Agilent 1100 Series separation module equipped with an Agilent 1100 Series diode array and/or multiple wavelength detectors and an Agilent 1100 Series fraction collector, controlled using ChemStation Rev.9.03A and Purify version A.1.2 software.

### **1.2 Collection, cultivation, and characterisation of *Streptomyces* sp. (CMB-M0423)**

Strain CMB-M0423 was isolated from a sediment sample (1 m depth) collected from Heron Island, Queensland. Wet sediment (1 mL) was transferred to a Falcon tube (5 mL) containing Ocean Nature seawater (4 mL of 33 g/L), shaken vigorously and heat-shocked at  $55 \text{ }^\circ\text{C}$  for 8 min. An aliquot of the supernatant ( $50 \mu\text{L}$ ) was dispersed across a solid phase agar isolation plate (M1 media) in the presence of 3.3% artificial ocean sea salt and incubated at  $27 \text{ }^\circ\text{C}$  for 3 weeks. The plate was monitored on a regular basis for microbial growth. A pure culture was obtained for strain CMB-M0423 by repeated, single colony transfer on solid media.

### **1.3 Analytical cultivation and chemical profiling of *Streptomyces* sp. (CMB-M0423)**

A single colony of CMB-M0423 was sub-sampled into seawater medium (100 mL of Ocean Nature seawater, 1% starch, 0.4% yeast extract and 0.2% peptone) and incubated at  $27 \text{ }^\circ\text{C}$  for 15 d at 190 rpm. The culture was extracted with EtOAc (100 mL), and the organic phase concentrated in vacuo to yield an extract (2 mg) that was subsequently analyzed by HPLC-DAD-MS with conditions set as follows (Zorbax  $\text{C}_8$  column,  $150 \times 4.6$  mm,  $5 \mu\text{m}$ ,  $1 \text{ mL}/\text{min}$ , gradient from 90–10%  $\text{H}_2\text{O}/\text{MeCN}$ ,

with an isocratic 0.05% formic acid modifier, over 15 min, with a hold at 100% MeCN for 5 min). Several peaks were detected and one of them ( $t_R = 9.1$  min) exhibited the following  $m/z$   $[M - H]^-$  365 (**6**). HRMS (ESI-TOF)  $m/z$   $[M + Na]^+$  calcd for  $C_{19}H_{30}N_2NaO_5$  389.2047; found: 389.2067.

#### 1.4 Preparative cultivation for *Streptomyces* sp. (CMB-M0423)

Three Erlenmeyer flasks (2 L) containing M1 broth (400 mL; 1% starch, 0.4% yeast extract and 0.2% peptone) in the presence of 3.3% artificial ocean sea salt were inoculated with a starter culture (3 mL) of *Streptomyces* sp. (CMB-M0423) and incubated at 27 °C on a rotary shaker at 190 rpm for 15 days. The flasks were then extracted EtOAc (2 × 250 mL per flask) and the organic phases were combined and concentrated in vacuo to yield a combined EtOAc extract (60 mg). The EtOAc extract was sequentially triturated (8 mL aliquots) to recover hexane (15 mg),  $CH_2Cl_2$  (40.2 mg) and MeOH (3.2 mg) soluble materials. The  $CH_2Cl_2$  partition was further fractionated by HPLC (Zorbax  $C_8$  column, 250 × 9.4 mm, 5  $\mu$ m, 3 mL/min, gradient elution from 90–10%  $H_2O/MeOH$  over 40 min, with a hold at 100% MeOH for 5 min) to afford heronapyrrole D (**6**) ( $t_R = 15$  min, 0.5 mg, 0.8%) [Note: % yields are determined on a mass to mass basis against the weight of EtOAc crude extract] (Figure S1).

#### 1.5 Chemical analysis of synthetic and natural heronapyrrole D (**6**)

Different solutions of synthetic and natural heronapyrrole D (**6**) 0.05 mg/mL were dissolved in MeOH (1 mL) and the solutions were analyzed by HPLC-MS (Zorbax SB- $C_8$  5  $\mu$ m 150 × 4.6 mm column, 1.0 mL/min, gradient elution from 90%  $H_2O/MeCN$  to 100% MeCN over 15 min followed by a 5 min hold at 100% MeCN, with isocratic 0.05% formic acid modifier) (Figure S2)

#### 1.6 Antibacterial assay

The bacterium to be tested was streaked onto a tryptic soy agar plate and was incubated at 37 °C for 24 h. One colony was then transferred to fresh tryptic soy broth (15 mL) and the cell density was adjusted to  $10^4$ – $10^5$  cfu/mL. The compounds to be tested were dissolved in DMSO and diluted with  $H_2O$  to give 300  $\mu$ M stock solutions (10% DMSO). The stock solutions were then serially diluted with 10% DMSO to give final concentrations of 30  $\mu$ M to 0.01  $\mu$ M in 1% DMSO. An aliquot (20

$\mu\text{L}$ ) of each dilution was transferred to a 96-well microtiter plate and freshly prepared microbial broth (180  $\mu\text{L}$ ) was added to each well. The plates were incubated at 37 °C for 24 h and the optical density of each well was measured spectrophotometrically at 600 nm using POLARstar Omega plate (BMG LABTECH, Offenburg, Germany). Each test compound was screened against the Gram-negative bacteria *Escherichia coli* (ATCC 11775) and *Pseudomonas aeruginosa* (ATCC 10145) and the Gram-positive bacteria *Staphylococcus aureus* (ATCC 9144 and ATCC 25923) and *Bacillus subtilis* (ATCC 6633 and ATCC 6051). The  $\text{IC}_{50}$  value was calculated as the concentration of the compound or anticancer drug required for 50% inhibition of the cancer cells using Prism 5.0 from GraphPad Software Inc. (La Jolla, CA) (Figure S3 and Figure S4).

## 1.7 Antifungal assay

The fungus to be tested was streaked onto a Sabouraud agar plate and was incubated at 26.5 °C for 48 h. One colony was then transferred to fresh Sabouraud broth (15 mL) and the cell density was adjusted to  $10^4$ – $10^5$  cfu/mL. Test compounds were dissolved in DMSO and diluted with  $\text{H}_2\text{O}$  to give a 300  $\mu\text{M}$  stock solution (10% DMSO). The stock solution was then serially diluted with 10% DMSO to give final concentrations of 30  $\mu\text{M}$  to 0.01  $\mu\text{M}$  in 1% DMSO. An aliquot (20  $\mu\text{L}$ ) of each dilution was transferred to a 96-well microtiter plate and freshly prepared microbial broth (180  $\mu\text{L}$ ) was added to each well. The plates were incubated at 26.5 °C for 48 h and the optical density of each well was measured spectrophotometrically at 600 nm using POLARstar Omega plate (BMG LABTECH, Offenburg, Germany). Each test compound was screened against the fungus *Candida albicans* (ATCC 90028). The  $\text{IC}_{50}$  value was calculated as the concentration of the compound or anticancer drug required for 50% inhibition of the cancer cells using Prism 5.0 from GraphPad Software Inc. (La Jolla, CA).

## 2 Experimental part performed by Stark group

### 2.1 General experimental details

All reagents were used as purchased from commercial suppliers. Dry solvents were obtained from a MBraun solvent purification system (MB-SPS-800). All reactions were performed under an atmosphere of dry nitrogen. Reactions were monitored by thin-layer chromatography using silica pre-coated aluminium plates and stained with vanillin [vanillin (1 g), conc.  $\text{H}_2\text{SO}_4$  (10 mL), AcOH (20 mL) ethanol (170 mL)] or ceric ammonium molybdate [phosphomolybdic acid (25 g),

Ce(SO<sub>4</sub>)<sub>2</sub>·2H<sub>2</sub>O (10 g), conc. H<sub>2</sub>SO<sub>4</sub> (60 mL), H<sub>2</sub>O (940 mL)]. Chromatographic purification was performed as flash chromatography on silica gel (particle size 0.040–0.063 mm). Yields refer to chromatographically purified and spectroscopically pure compounds. NMR spectra were obtained on a Bruker DRX-500 spectrometer (operating at 500 MHz for <sup>1</sup>H and 125 MHz for <sup>13</sup>C acquisitions) in the indicated solvents. Chemical shifts  $\delta$  are reported in ppm with tetramethylsilane (TMS) or according to solvent resonance as the internal standard. Coupling constants  $J$  are given in Hertz (Hz). 2D NMR (H-COSY, HSQC, HMBC) data were used for the assignment of all final compounds. High-resolution ESI-MS measurements were obtained on an Agilent 6224 ESI-TOF mass spectrometer. IR spectra were recorded on a Bruker ALPHA FT-IR Platinum ATR spectrometer by attenuated total reflection. Absorbance frequencies  $\tilde{\nu}$  are reported in reciprocal centimeters (cm<sup>-1</sup>). Chiroptical measurements ( $[\alpha]_D$ ) were obtained on a Krüss Optronic P8000 polarimeter at 589 nm using a 100 mm path-length cell in the solvent and concentration indicated. All compounds were named according to IUPAC rules. For simplicity, the numbering of the carbon atoms of a given structure did not follow the IUPAC rules.

## 2.2 Synthesis of (*S,E*)-1-((2*R*,5*R*)-5-(2-hydroxypropan-2-yl)-2-methyltetrahydrofuran-2-yl)-4-methyl-6-(5-nitro-1*H*-pyrrol-3-yl)hex-4-en-1-ol (**6**)

To a stirred solution of (*R*)-diol **8** (284 mg, 0.63 mmol, 1.00 equiv) in MeCN/(CH<sub>3</sub>O)<sub>2</sub>CH<sub>2</sub> (12 mL, 1:2) were added Na<sub>2</sub>B<sub>4</sub>O<sub>7</sub>·10H<sub>2</sub>O in 4 × 10<sup>-4</sup> M Na<sub>2</sub>EDTA (0.05 M, 8.0 mL), *n*-Bu<sub>4</sub>NHSO<sub>4</sub> (12 mg, 0.035 mmol, 0.055 equiv) and (+)-Shi ketone [S1] (97.0 mg, 0.38 mmol, 0.60 equiv). The mixture was cooled to 0 °C and solutions of Oxone<sup>®</sup> (658 mg, 1.07 mmol, 1.70 equiv) in Na<sub>2</sub>EDTA (4 × 10<sup>-4</sup> M, 5.0 mL) and of K<sub>2</sub>CO<sub>3</sub> (609 mg, 4.41 mmol, 7.00 equiv) in H<sub>2</sub>O (5 mL) were added separately via syringe pump over 90 min at 0 °C. The reaction mixture was diluted with H<sub>2</sub>O (20 mL) and extracted with ethyl acetate (3 × 10 mL). The combined organic layers were dried over Na<sub>2</sub>SO<sub>4</sub> and the solvent was removed under reduced pressure. The crude mixture was dissolved in dry toluene (20 mL) and (+)-camphorsulfonic acid (8.0 mg, 0.034 mmol, 0.05 equiv) was added at 0 °C. The solution was stirred for 1 h. Triethylamine (50  $\mu$ L) was added and all volatiles were removed under reduced pressure (1 × 10<sup>-2</sup> mbar). The residue was dissolved in MeCN (10 mL) and water (2 mL) was added. The solution was acidified with catalytic amounts of *p*-TsOH and heated to 50 °C for 1 h. Triethylamine (50  $\mu$ L) was added after complete conversion and all volatile materials were removed under reduced pressure. Flash chromatography (66% ethyl acetate in

hexanes, silica) of the residue gave the title compound (46 mg, 20%) and heronapyrrole C (19 mg, 8%) as yellowish oils.

### 2.2.1 Compound characterization

(*S,E*)-1-((2*R,5R*)-5-(2-hydroxypropan-2-yl)-2-methyltetrahydrofuran-2-yl)-4-methyl-6-(5-nitro-1*H*-pyrrol-3-yl)hex-4-en-1-ol (**6**):

yellow oil;  $[\alpha]_D^{20} +3.9$  (*c* 0.1, MeOH); **IR** (ATR)  $\tilde{\nu} = 3362, 2972, 2927, 2872, 1503, 1452, 1356, 1294, 1266, 1119, 963, 886, 743 \text{ cm}^{-1}$ ; **NMR** (500 MHz, CD<sub>3</sub>OD)  $\delta_{\text{H}}$  6.88 (d, *J* = 1.5 Hz, 1 H, H-5), 6.82 (d, *J* = 1.5 Hz, 1 H, H-3), 5.38 (t, *J* = 7.0 Hz, 1 H, H-7), 3.71 (dd, *J* = 9.5 Hz, *J* = 6.1 Hz, 1 H, H-15), 3.40 (dd, *J* = 10.3 Hz, *J* = 1.4 Hz, 1 H, H-11), 3.19 (d, *J* = 7.0 Hz, 2 H, H-6), 2.31-2.26 (m, 1 H, H-9a), 2.15-2.09 (m, 1 H, H-9b), 2.06-1.98 (m, 1 H, H-13a), 1.86-1.75 (m, 3 H, H-10a, H-14), 1.70 (s, 3 H, H-19), 1.64-1.59 (m, 1 H, H-13b), 1.42-1.34 (m, 1 H, H-10b), 1.15 (s, 3 H, H-17), 1.12 (s, 6 H, H-18, H-20) ppm;  $^{13}\text{C}$  (125 MHz, CD<sub>3</sub>OD)  $\delta_{\text{C}}$  138.7 (C-2), 137.4 (C-8), 127.6 (C-4), 123.9 (C-7), 123.4 (C-3), 111.3 (C-5), 88.0 (C-15), 86.7 (C-12), 76.9 (C-11), 72.2 (C-16), 37.3 (C-9), 35.1 (C-13), 30.8 (C-10), 27.7 (C-14), 26.4 (C-17), 26.1 (C-6), 25.1 (C-18/20), 22.7 (C-18/20), 16.1 (C-19) ppm; **HRMS** (ESI-TOF) *m/z* [M+Na]<sup>+</sup> calcd for C<sub>19</sub>H<sub>30</sub>N<sub>2</sub>NaO<sub>5</sub> 389.2047; found: 389.2067.

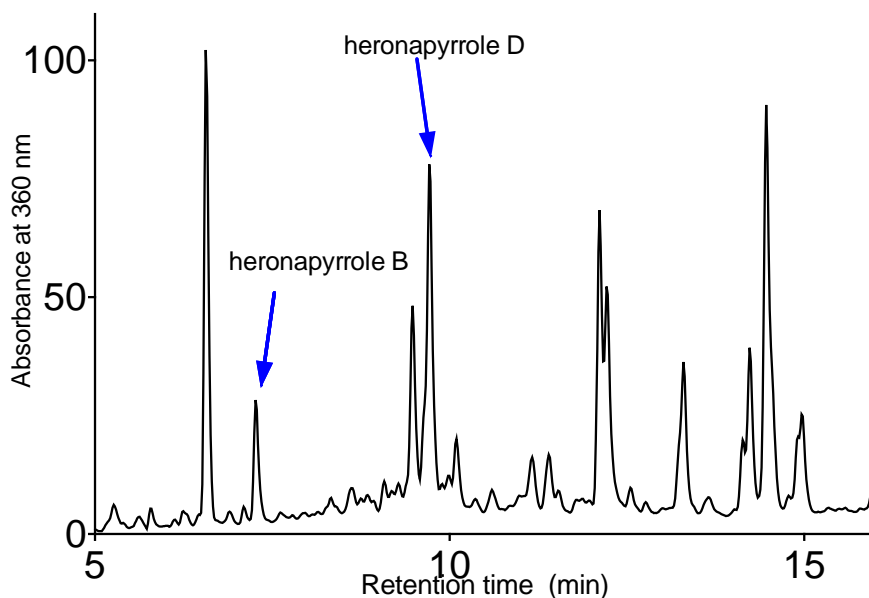

**Figure S1:** HPLC–DAD–MS chromatogram of the crude extract from *Streptomyces* sp. (CMB-M0423) showing the secondary metabolites production including minor metabolites. Analytical gradient H<sub>2</sub>O/MeCN containing 0.05% HCO<sub>2</sub>H using a Zorbax C<sub>8</sub> column; absorbance at 360 nm.

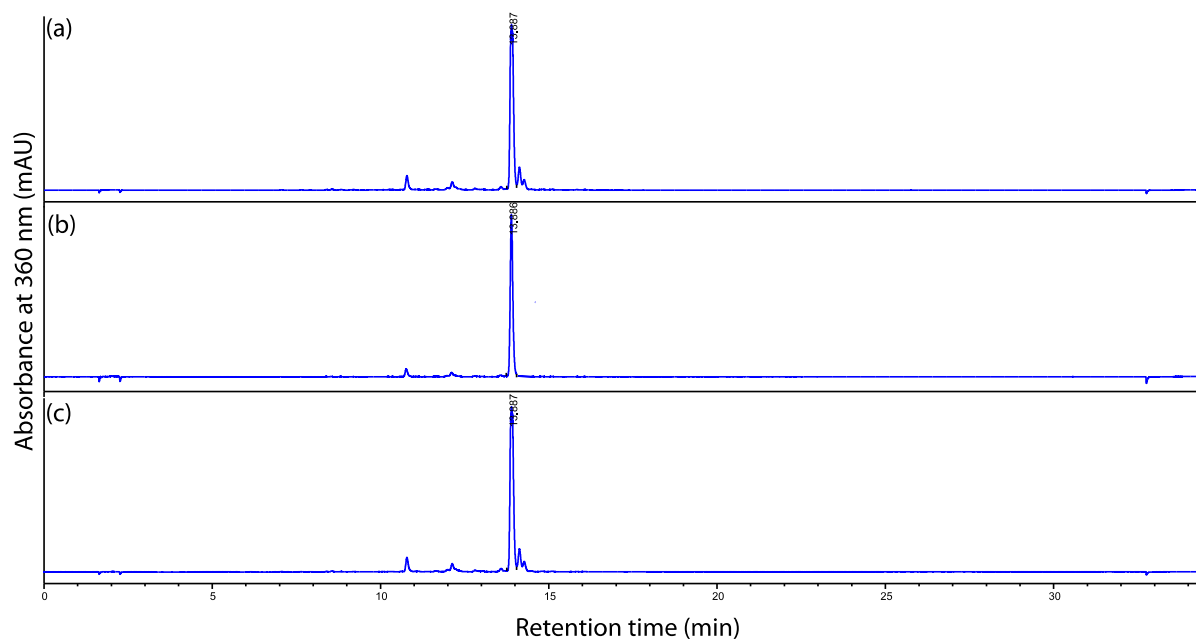

**Figure S2:** HPLC–DAD (360 nm) chromatogram of samples of heronapyrrole D, (a) natural, (b) synthetic and (c) co-injection of natural and synthetic.



*Bacillus subtilis* ATCC 6633

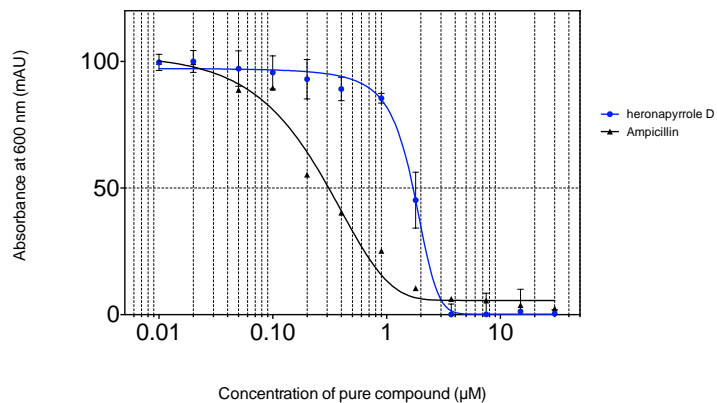

*Staphylococcus aureus* ATCC 25923

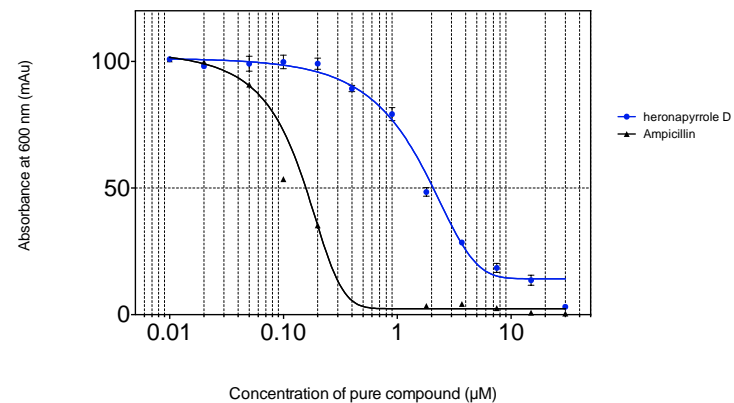

*Staphylococcus epidermidis* ATCC 12228

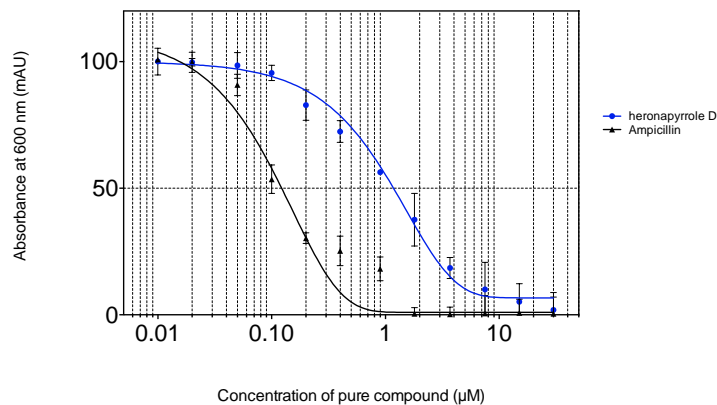

*Candida albicans* ATCC 90028

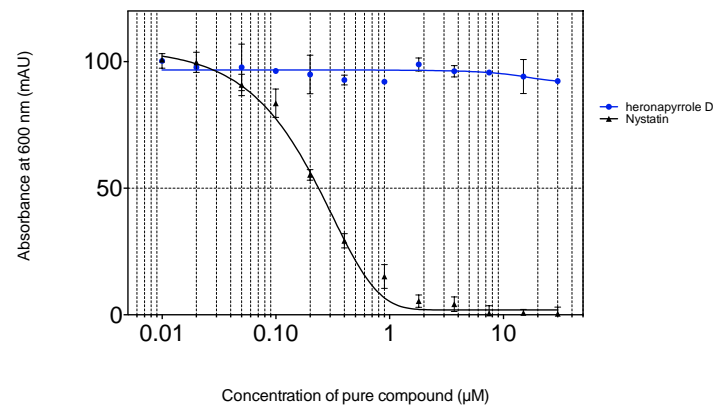

**Figure S3:** Antibacterial activity of **6** (average of two runs).

*Escherichia coli* ATCC 25922

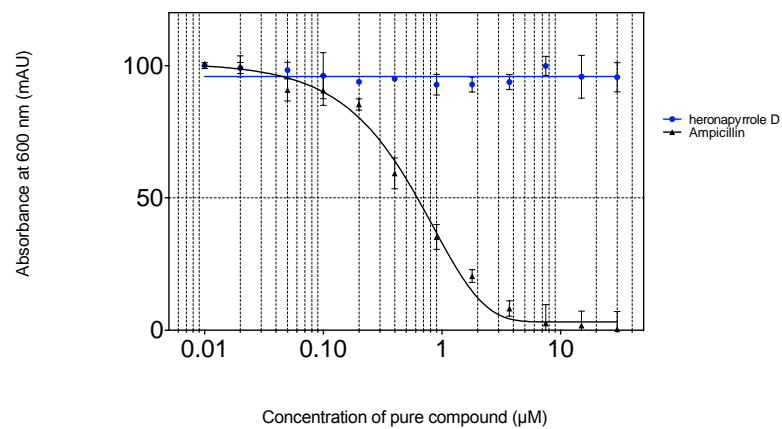

*Pseudomonas aeruginosa* ATCC 27853

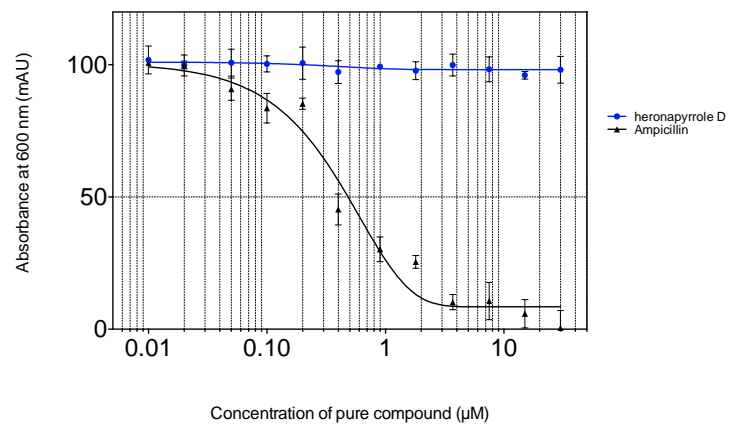

**Figure S4:** Antibacterial activity of **6** (average of two runs).

| Compounds       | <i>Escherichia coli</i><br>ATCC 25922 |                                       | <i>Pseudomonas aeruginosa</i><br>ATCC 27853 |                                       | <i>Staphylococcus aureus</i> ATCC<br>25923 |                                       | <i>Staphylococcus epidermidis</i><br>ATCC 12228 |                                       | <i>Bacillus subtilis</i><br>ATCC 6633 |                                       | <i>Candida albicans</i> ATCC<br>90028 |                                       |
|-----------------|---------------------------------------|---------------------------------------|---------------------------------------------|---------------------------------------|--------------------------------------------|---------------------------------------|-------------------------------------------------|---------------------------------------|---------------------------------------|---------------------------------------|---------------------------------------|---------------------------------------|
|                 | MIC<br>( $\mu\text{M}$ )              | IC <sub>50</sub><br>( $\mu\text{M}$ ) | MIC<br>( $\mu\text{M}$ )                    | IC <sub>50</sub><br>( $\mu\text{M}$ ) | MIC<br>( $\mu\text{M}$ )                   | IC <sub>50</sub><br>( $\mu\text{M}$ ) | MIC<br>( $\mu\text{M}$ )                        | IC <sub>50</sub><br>( $\mu\text{M}$ ) | MIC<br>( $\mu\text{M}$ )              | IC <sub>50</sub><br>( $\mu\text{M}$ ) | MIC<br>( $\mu\text{M}$ )              | IC <sub>50</sub><br>( $\mu\text{M}$ ) |
| Heronapyrrole D | --                                    | --                                    | --                                          | --                                    | 3.7                                        | 1.8                                   | 1.8                                             | 0.9                                   | 3.7                                   | 1.8                                   | --                                    | --                                    |
| Ampicillin      | 0.9                                   | 0.6                                   | 0.5                                         | 0.36                                  | 0.2                                        | 0.15                                  | 0.2                                             | 0.1                                   | 0.4                                   | 0.25                                  | --                                    | --                                    |
| Nystatin        | --                                    | --                                    | --                                          | --                                    | --                                         | --                                    | --                                              | --                                    | --                                    | --                                    | 0.4                                   | 0.2                                   |

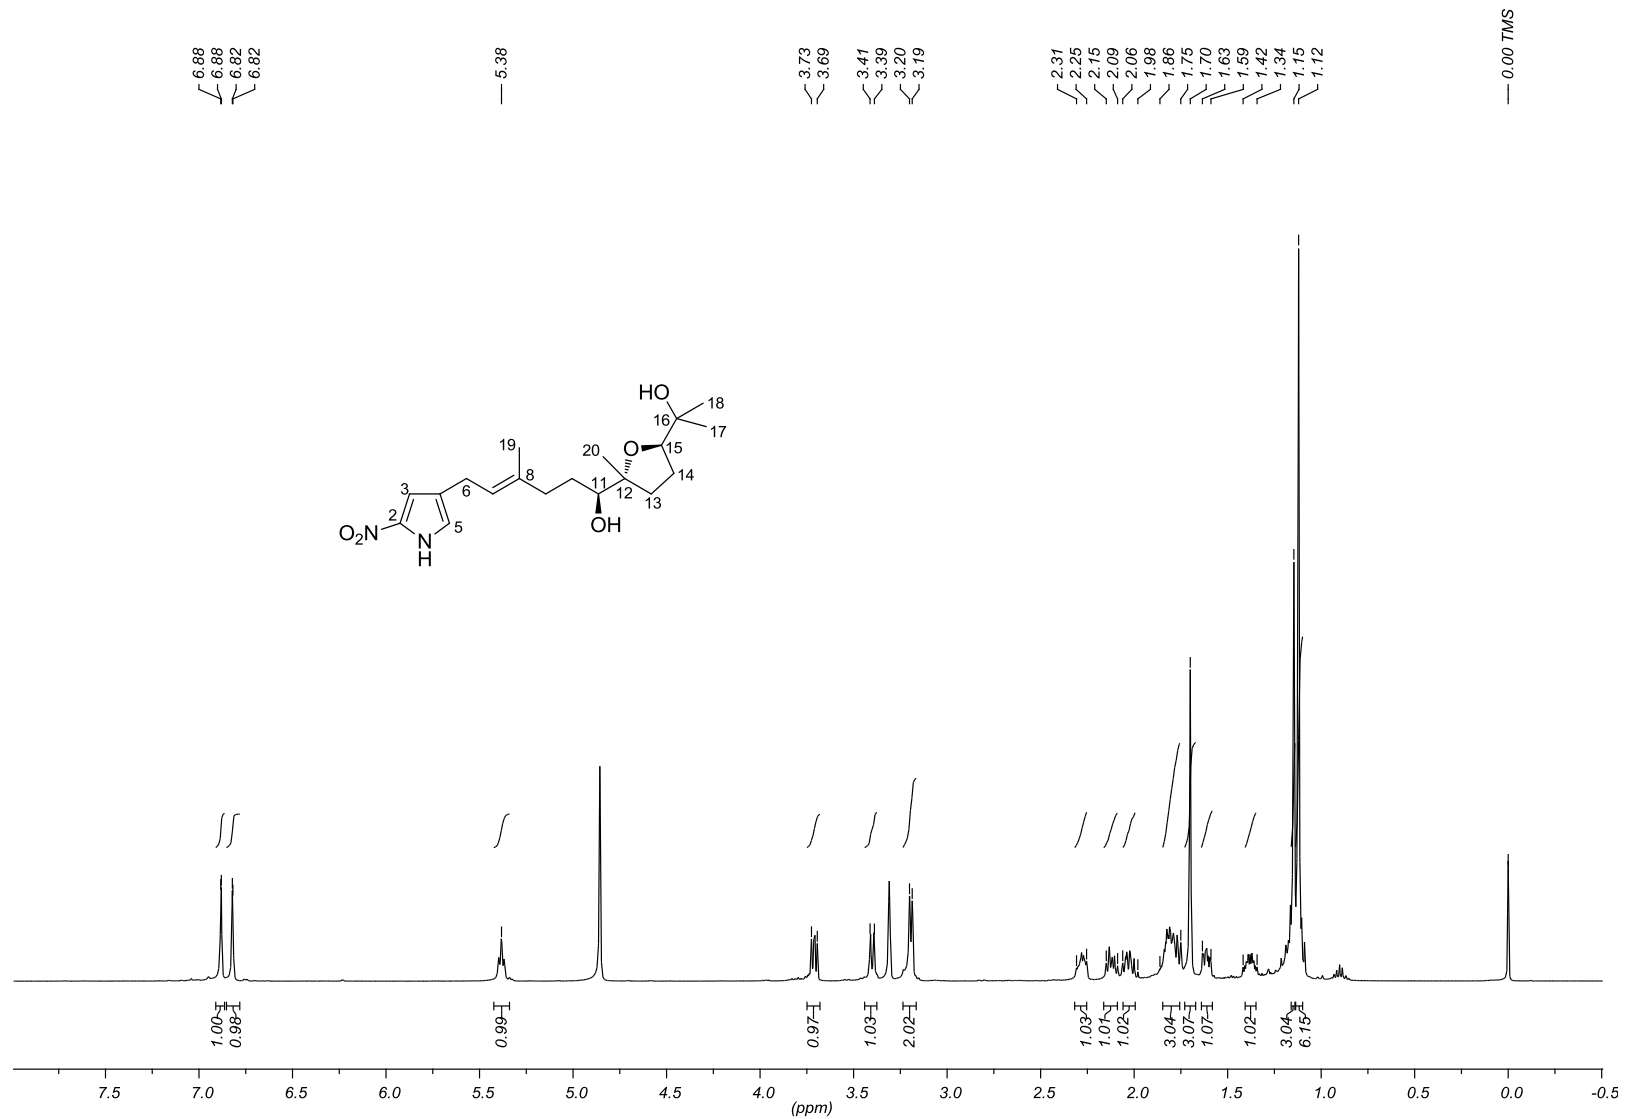

**Figure S5:**  $^1\text{H NMR}$  (500 MHz,  $\text{CD}_3\text{OD}$ ) spectrum of **6**.

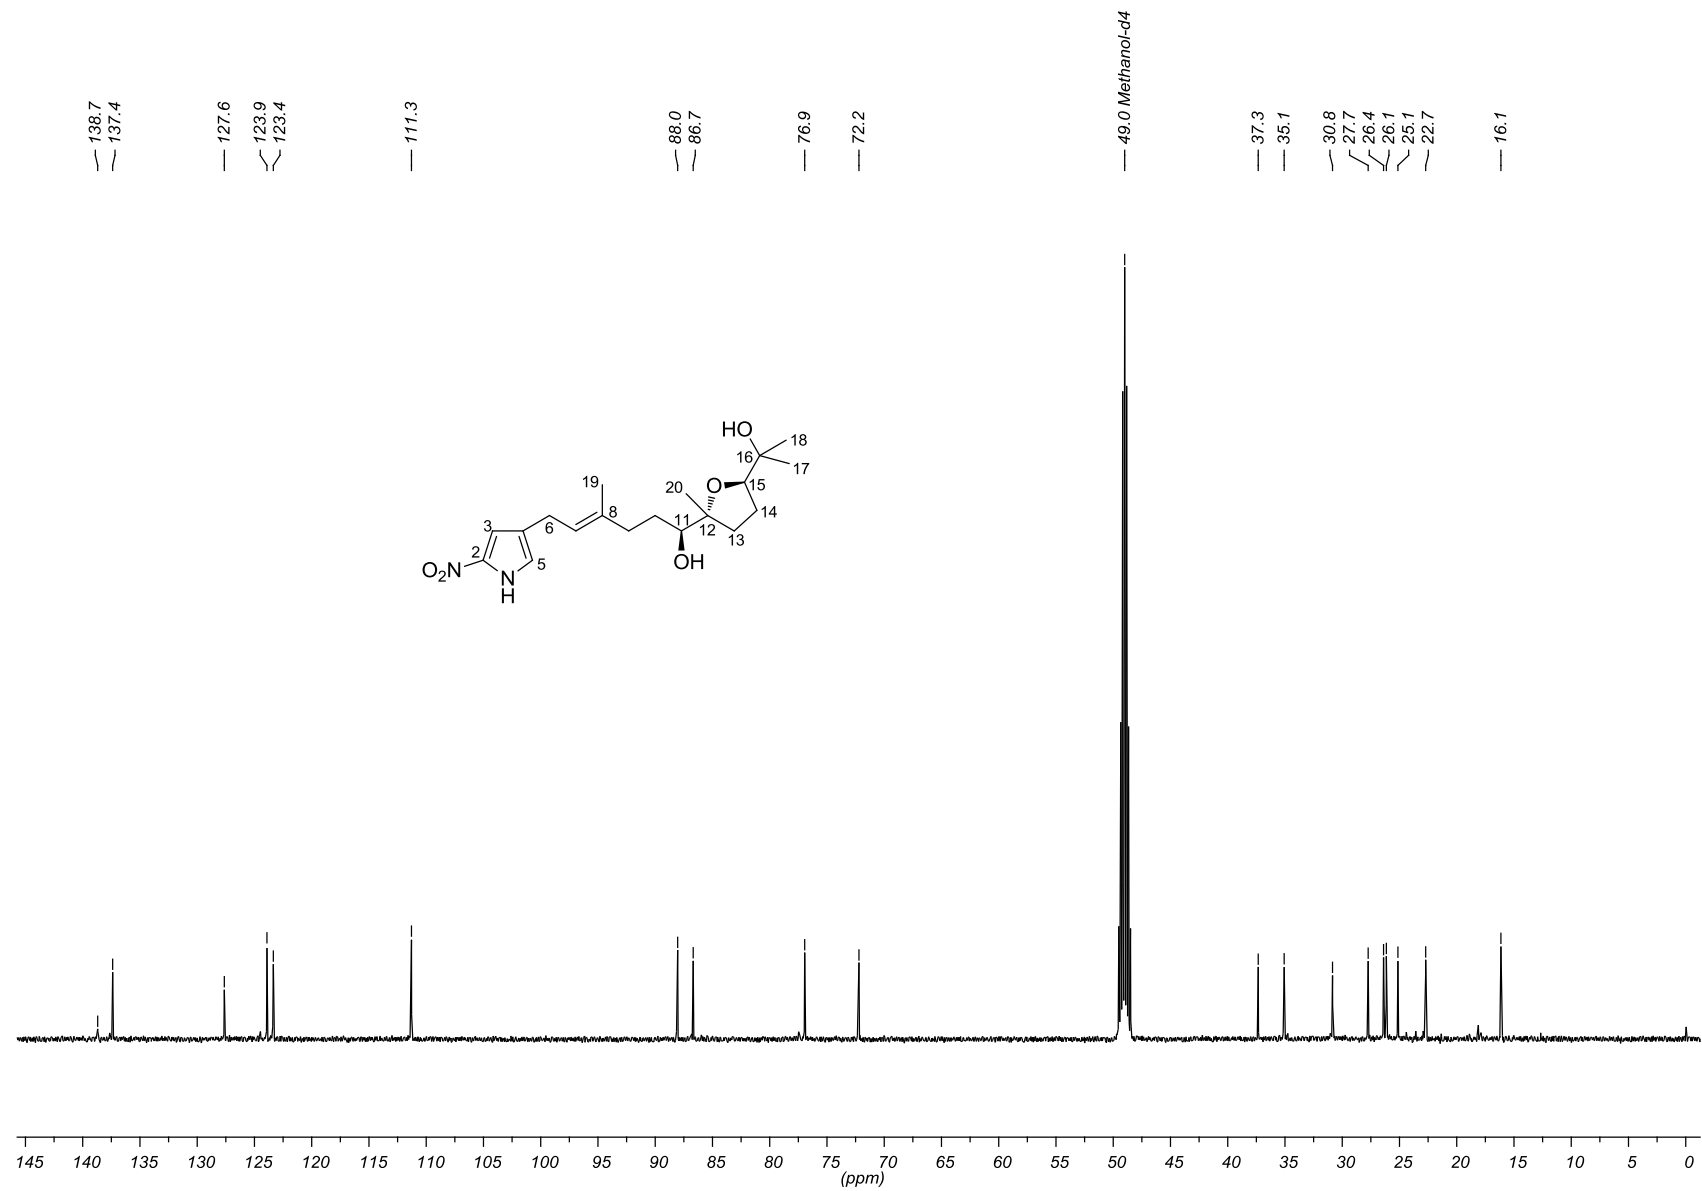

**Figure S6:**  $^{13}\text{C}$  (125 MHz,  $\text{CD}_3\text{OD}$ ) spectrum of **6**.

## References

S1 (a) Zhao, M.-X.; Shi, Y. *J. Org. Chem.* **2006**, *71*, 5377–5379. (b) Wang, Z.-X.; Tu, Y.; Frohn, M.; Zhang, J.-R.; Shi, Y. *J. Am. Chem. Soc.* **1997**, *119*, 11224–11235. For a review, see: Frohn, M.; Shi, Y. *Synthesis* **2000**, 1979–2000.
